# Supplementary material
Source: PubMed Central journal article supplement (PMC4006587)
Supplement: supp_217.9.1444_JEB093690.pdf [file supp_217.9.1444_JEB093690.pdf]

```

>N.vectensis catalase
TCCTTCTCTGATCGTTCGTCGCAAGGAGAAAAGTCGGCCGAATCCATTTTTTGTGTGGAAAACATCTGAGTTT
GCTTTGAACATGGCGTCCAAATGCAAGGCCCTCGGAGCAGCTGTCTGACTATGCTAAAATCTCAATCGAATG
TGGCAGGCCTGACCACCAGTGTCTGGTATCCCTGTTGACACGAATGCAAGCAGCATGACGGCTGGCCCCCG
CGGACCCCTCCTTATGCAAGACGCCCAGTTCATGGACATCATGTCTCATTTTTGACCATGAGAGGATCCCT
GAGCGAGTCGTCCATGCCAAGGGCGGCGGTGCGTTTTGGGTACTTTGAGGTTACCAATGATATCACTAAGT
ACTGCAAGGCCAGGATCTTTGAAACTGTTGGGAAGAAGACTCCATGTCTGGTCAGGTTCTCCACTGTGGG
TGGTGAGGCTGGAAGTGTGATACAGCCAGAGATCCCCGTGGTTTCGCCATGAAGTTCTACACAGATGAG
GGCAACTGGGACCTTGTCGGAAACAACACCCCTATCTTCTTCATCCGGGACCCAATTCTGTTCCCCAGTT
TTATTTCATACGCAGAAGAGAAAATCCTGTTACACATTTGAAAGGATGCCACATGTTTTGGGACTTTATCAC
TCTTCGTCTGAGACCACCCACCAGACGTCTTTCCTGTTTCAGTGACCGAGGCATCCCTGATGGGTTCGCG
CACATGAACGGCTATGGAAGCCACACCTTCAAGATGGTGAACAGCAAGGGGAAGGCTGTGTACTGCAAGT
TCCATGTGAAGACGGACCAGGGAATCAAGAATTGCCAGTCGAGAGAGCTACAGAGCTTGCAGGCACCGA
CCCAGACTACAGCACTAGGGATCTTTATAATGCTATTGCTGAGGGGAACATCCATCTTGGACCATGTAC
ATCCAAGTGATGACATTTGCTGAAGCAGAGAGCCACAGGTTTAACCCATTTGACCTTACCAAGATCTGGC
CCCATGCAGAGTTCCCTCTCATCCCTGTTGGAAAGATGGTGTGAATAGAAAACCCCAAGAACTACTTTGC
GGAGATTGAACAGAGTGCCTTCAACCCAGCTAGCATGGTCCCAGGGATTGAGGCTTCCCTGATAAGATG
CTGCAGGGTGCCTTGTTCCTACCATGACACCCACCTTCACCGACTTGGCACAAACTACACCCAGCTTC
CAGTCAACTGTCCATTTCAGGACCCGTGTTGCCAACTACCAGCGGGATGGACCCAGACATTTGACAATCA
GGAAGGTGCGCCAAACTACTTCCCCAACAGCTTCTCAGGCCCCATGGATGATGTGGCCAAAGTACTCCCT
TCTCAATTCACTGTTTTCTGGGGACTGCGCCCGCTACAACAGTGCTGATGATGACAATTTTACCCAAGTGA
CAACCTTTTGGACTAAAAGTGTAAATGATGAAGAGCGCATGCGGCTAGTAAAAGAACATCGCTGGCCACGT
GAAGGACGCCAAGGACTTTATCCAAAAACGATGCGTACAACAATTCACTAAGGTTACCCAGACTTCGGA
AATGGAATTGCGCGAGAGCTGCAAAAACATCAAAAAGAGTGCGTCTTCGGTTCGAGCACACGCCGCCCTCT
GAGTTATTACGTGCACTTACGTGACGTGTTCTTAAACAATAGCAAACGGTAGACGTAAATGGTTATGG
TACTTCTGGCCTCACGATAACCCGTGCTGGTCTTCTCGTGTCTGTGTAGTGTAGCCATTTAGTGGTGTG
GCGATTGCATGTGGCGAGCACGTGATAAAAAACAGGTTAAACAAGAATGAACACTTGGCTAANAANAATGGT
TAAACAAGAAATAATTGTTGTTGTAGTGATACGTTAGTATCATTATCAGTACAAATGATAAACACGTGAT
TGACAAGAGGTTAGACAGGATGAAAACGTGATTTGAAAACAGGTTAGACAGGAAATCACTGACGCTGTAGT
GATGCTGTGTATCAGTGAACATATGATGAACACAAGAGTATAAACACAGCAAGTGTATCGTAGCGT

```

**Fig. S1.** (A) Catalase nucleotide sequence from *N. vectensis*, assembled in silico from multiple overlapping expressed sequence tags. (B) Predicted protein sequence for *N. vectensis* catalase aligned to catalase from the anemone *A. viridis* (accession number AAZ50618).

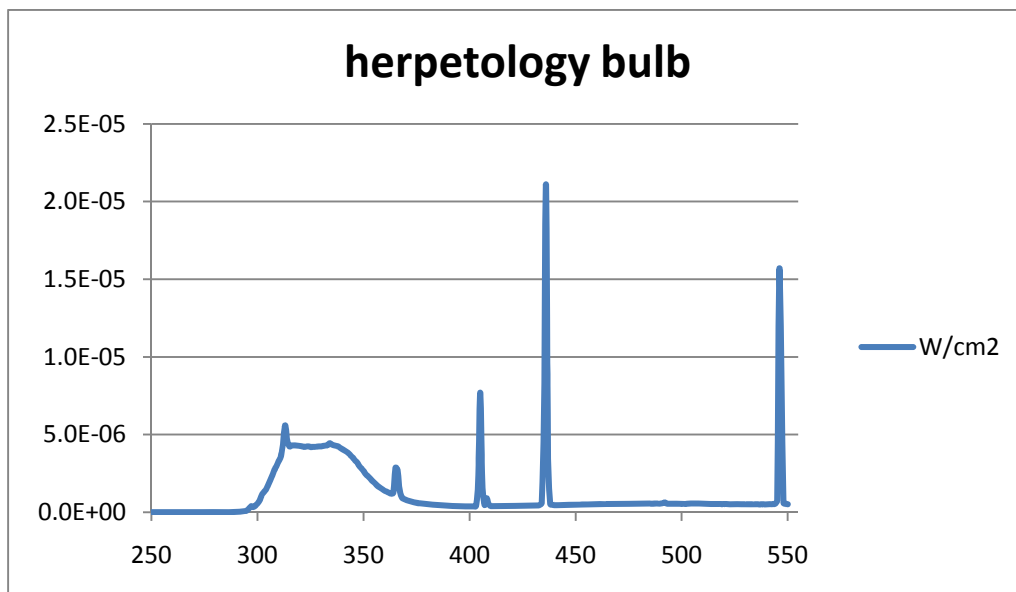

**Fig. S2.** Emission spectrum for the Zilla Desert Series fluorescent T5 bulb. Wavelength (nm) is shown on the x-axis, and irradiance ( $W\ cm^{-2}$ ) on the y-axis.

Supplementary Table 1: Primers used for quantitative PCR. F and R designate forward and reverse primers respectively.

|                                |                                                                   |
|--------------------------------|-------------------------------------------------------------------|
| NvCuZnSOD1<br>(JGI 234825)     | F: 5'-GGGTGTTTGTTCCTGGTAG-3'<br>R: 5'-TCTGAGAGTACAAGGGCCATC-3'    |
| NvCuZnSOD2<br>(JGI 165732)     | F: 5'-TCACACTTGTGGGAGAGCAC-3'<br>R: 5'-TCCTCGTCAGCATGAACAAC-3'    |
| NvCuZnSOD3<br>(JGI 3582)       | F: 5'-ATTACCAAGGGGTGCCAAAG-3'<br>R: 5'-GACCACACATTCCCAAGGTC-3'    |
| NvMnSOD1<br>(JGI 236349)       | F: 5'-GAAGCTCAGGCCAAAGGTG-3'<br>R: 5'-ACCACCTCCATTGAATTTGAC-3'    |
| NvMnSOD2<br>(JGI 94316)        | F: 5'-AGTGGAGAGAATCGGGAAAAG-3'<br>R: 5'-CTCCACCATTGTTGATCACG-3'   |
| NvCCS<br>(JGI 227361)          | F: 5'-CGTTTGTCCGTGTTTCAATG-3'<br>R: 5'-TTCCACAGCGAATTCCATC-3'     |
| NvCatalase <sup>1</sup>        | F: 5'-AAGGTGGGTGTCATGGTAGG-3'<br>R: 5'-TGCGGAGATTGAACAGAGTG-3'    |
| NvHSP70<br>(JGI 234533)        | F: 5'-TCATCCAGCACTGAAGCAAG-3'<br>R: 5'-CTCGGCTGATTTTCGTGTAG-3'    |
| NvHSC71<br>(JGI 195315)        | F: 5'-TCGATGATCCTGGGGTAAAG-3'<br>R: 5'-CCTGCCTCGTTCACTACCTC-3'    |
| Nv18S<br>(JGI 158236)          | F: 5'-GACTCAACACGGGGAAACTC-3'<br>R: 5'-GCACCACCACCATAGAATC-3'     |
| NvEF1 $\alpha$<br>(JGI 247215) | F: 5'-GAGAAGGAATCCAGCGAGATC-3'<br>R: 5'-TAAGGTCTCGAACTTCCACAGG-3' |

<sup>1</sup> NvCatalase is composed of JGI predicted proteins 103289 and 103340. See text and Fig. S1.
